1 **Widespread patterns of sexually dimorphic**  
2 **gene expression in an avian hypothalamic–pituitary–gonadal (HPG) axis**

3  
4  
5 Matthew D. MacManes<sup>1\*</sup>, Suzanne H. Austin<sup>2</sup>, Andrew Lang<sup>1</sup>, April Booth<sup>2</sup>, Victoria Farrar<sup>2</sup>,  
6 Rebecca M. Calisi<sup>2</sup>

7  
8 <sup>1</sup> Department of Molecular, Cellular, and Biomedical Sciences. University of New Hampshire,  
9 Durham NH 03824

10 <sup>2</sup> Department of Neurobiology, Physiology, and Behavior. University of California, Davis. Davis  
11 CA. 95616

12 \* Corresponding author: [MacManes@gmail.com](mailto:MacManes@gmail.com), [@MacManes](https://twitter.com/MacManes)

13  
14  
15 Keywords: reproductive axis, rock dove, pigeon, *Columba livia*, gene expression, RNAseq,  
16 reproduction, sexual behavior

17  
18  
19  
20  
21  
22  
23  
24  
25  
26  
27  
28  
29  
30  
31  
32  
33  
34

## 35 **ABSTRACT**

36 The hypothalamic-pituitary-gonadal (HPG) axis is a key biological system required for  
37 reproduction and associated sexual behaviors to occur. In the avian reproductive model of the  
38 rock dove (*Columba livia*), we characterized the transcript community of each tissue of the HPG  
39 axis in both sexes, thereby significantly expanding our mechanistic insight into HPG activity. We  
40 report greater sex-biased differential expression in the pituitary as compared to the  
41 hypothalamus, with multiple genes more highly expressed in the male pituitary being related to  
42 secretory function, and multiple genes more highly expressed in the female pituitary being  
43 related to reproduction, growth, and development. We report tissue-specific and sex-biased  
44 expression in genes commonly investigated when studying reproduction, highlighting the need  
45 for sex parity in future studies. In addition, we uncover new targets of investigation in both  
46 sexes, which could potentially change our understanding of HPG function.

47

## 48 **INTRODUCTION**

49 The hypothalamic-pituitary-gonadal (HPG) axis is a system comprised of endocrine  
50 glands whose function is vital to the regulation of reproduction and associated behaviors (Fig.  
51 1). In all vertebrates studied, from humans to Agnatha, the jawless fishes, the HPG axis is  
52 present and its function is generally conserved<sup>1</sup>. For reproduction to occur, the hypothalamus  
53 must produce and secrete gonadotropin-releasing hormone (GnRH), which causes the pituitary  
54 gland to secrete gonadotropins, luteinizing hormone (LH) and follicle stimulating hormone (FSH)  
55<sup>2</sup>. LH and FSH travel through the bloodstream and act upon receptors in the gonads (i.e. testes  
56 or ovaries), stimulating gametogenesis and the secretion of sex steroids, such as testosterone  
57 and estradiol. These sex steroids then bind with receptors within the HPG axis to create a  
58 feedback system that facilitates reproduction and sexual behaviors. The HPG axis has been  
59 lauded for providing a foundation to guide reproductive endocrinology investigations, but it has  
60 also been criticized as an overly simplistic depiction of the mechanisms mediating reproduction.  
61 Now, burgeoning genomic sequencing technologies are permitting a deeper and more complete  
62 understanding of the mechanistic drivers of reproduction. They are allowing us to understand  
63 how differential gene expression between the sexes could underpin sexually dimorphic  
64 reproductive behavior, and how the full complement of genes expressed in the HPG axis could  
65 work in concert to define physiology and behavior<sup>3</sup>.

66 Previous understanding of HPG function has come about by measuring the amount of  
67 circulating hormones in blood, conducting immunochemistry to visualize protein presence or  
68 absence, conducting *in situ hybridization* to visualize a target gene, and the use of endocrine

69 and receptor agonists and antagonists and their resulting physiological and behavioral effects.  
70 Due to recent technological advances, researchers are beginning to identify correlative and  
71 causative links between gene activity and phenotype<sup>4-10</sup>. Concerning the genomics of  
72 reproduction, some studies have generated whole-organism or tissue-specific sequence data of  
73 which the HPG axis was a subset<sup>11,12</sup>. Even fewer studies have reported observing differential  
74 gene expression of the HPG axis as a global system<sup>13</sup>. Here, we focus specifically on patterns  
75 of tissue and sexually dimorphic gene expression in the HPG axis of the rock dove (*Columba*  
76 *livia*) and discuss how they might relate to male and female reproductive strategies. Doves have  
77 been historically used to study reproductive behavior<sup>14,15</sup> and now are proving to be a valuable  
78 model for genomics research<sup>16-18</sup>.

79 We characterize the first sex-specific avian HPG axis transcriptome using RNA extracted  
80 from whole hypothalamus, pituitary, and gonads of sexually mature male and female rock doves  
81 (*Columba livia*). We constructed an annotated *de novo* transcriptome assembly for these  
82 tissues, which then enabled us to quantify the abundance of all mRNA transcripts per tissue.  
83 We elected to perform a *de novo* assembly, rather than use any other alternative approach  
84 (e.g., mapping reads to the chicken or rock dove genome), after preliminary mapping  
85 experiments suggested that genes important to the behavioral phenotypes in question were not  
86 well represented in existing genomic resources. By incorporating candidate gene and *ab initio*  
87 approaches across all tissue types and between sexes, we were able to both characterize  
88 general patterns of gene expression and identify specific patterns of sex-biased expression. It is  
89 our intention that these data illuminate sex differences in gene presence and abundance  
90 throughout the HPG axis when birds are at a basal state (i.e. reproductively mature but sampled  
91 when not actively breeding). By doing this, we create a resource for the scientific community to  
92 devise further studies of how gene expression patterns change over different reproductive  
93 stages and in response to physical and social events. As the HPG axis is fairly well-conserved  
94 across vertebrates, these data may be useful for formulating potential therapeutic strategies for  
95 abnormal HPG axis function.

96

97

98

99

100

101

102

103 Figure 1. Depiction of the hypothalamus, pituitary, and gonads of male and female rock doves.  
104 Illustration by Natalia Duque.

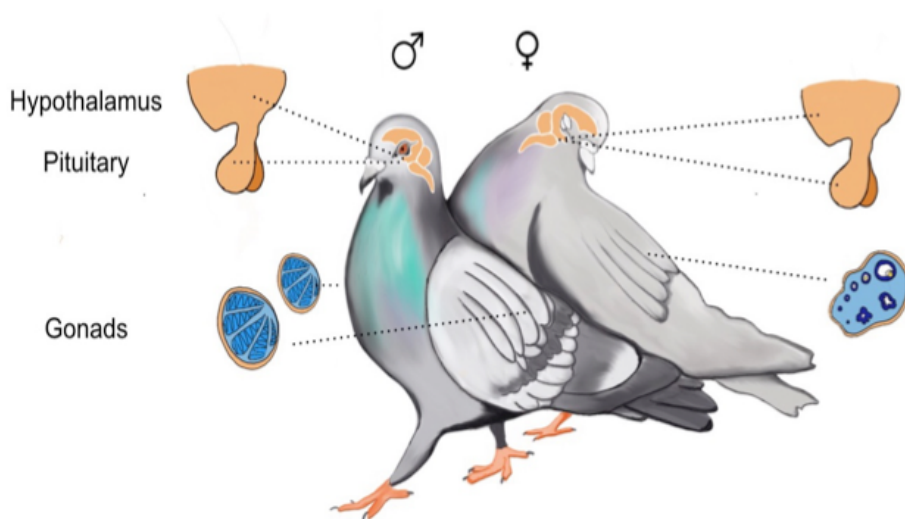

105  
106  
107  
108

## 109 **Results**

### 110 ***Sequence Read Data & Code Availability***

111 In total, 20 hypothalamus (11 male, 9 female), 23 pituitary (14 male, 9 female), 13 testes, and  
112 10 ovary samples from 24 birds were sequenced. Each sample was sequenced with between  
113 2.3 million and 24.5 million read pairs. All read data are available using the project ID  
114 PRJEB16136. Code used for the analysis of these data are available at <https://git.io/vPA09>.

115

### 116 ***Transcriptome Assembly and Evaluation***

117 The Rock Dove transcriptome assembly consists of 88,011 transcripts (available here  
118 <https://goo.gl/PYrzas>, dryad on acceptance). This assembly, along with the annotations  
119 contained in gff3 format, is available at <https://goo.gl/DyZ8pw> (dryad on acceptance). The  
120 transcriptome contains 25,696 with at least 1 hit to the Pfam database, 46,854 hits to  
121 OrthoDB<sup>19</sup>, 51,522 hits to the Uniref90 database, 3,108 hits to the transporter database<sup>20</sup>, and  
122 452 hits to the Rfam database<sup>21</sup>. These 88,011 assembled transcripts map to 15,102 unique  
123 genes in the *Gallus* genome. The evaluation using BUSCO and TransRate are presented in  
124 Table 1 and 2 respectively.

125

126 Table 1: Quality control statistics for the assembled transcriptome: BUSCO metrics include  
127 statistics regarding the number of universal vertebrate single copy orthologs found in the  
128 assembly. 85.9% of the Avian BUSCOs were identified as full length (complete) sequences,  
129 while 4.3% were found to be fragmented. 27.5% were found in greater than 1 copy in the Rock  
130 Dove transcriptome.

131

|                 | BUSCO    |            |            |
|-----------------|----------|------------|------------|
|                 | Complete | Duplicated | Fragmented |
| Rock Dove 1.0.3 | 85.9%    | 27.5%      | 4.3%       |

132

133 Table 2: Quality control statistics for the assembled transcriptome: TransRate metrics are  
134 derived from mapping RNAseq reads to the assembly, with higher scores indicating a higher  
135 quality assembly. A score of 0.41 ranks this assembly higher than the majority of other  
136 published transcriptomes, with 90% of reads mapping, and only 2% of bases uncovered (no  
137 read support) and 0% contigs low-covered (mean per-base read coverage of < 10).

138

|                 | TRANSRATE |                   |               |                 |                         |                            |
|-----------------|-----------|-------------------|---------------|-----------------|-------------------------|----------------------------|
|                 | Score     | Number of Contigs | Assembly Size | Percent Mapping | Percent Bases Uncovered | Percent Contigs Lowcovered |
| Rock Dove 1.0.3 | 0.41      | 88011             | 146.8Mb       | 90              | 2                       | 0                          |

139

140

141

#### 142 ***Sequence Read Mapping and Estimation of Gene Expression.***

143 Raw sequencing reads corresponding to individual samples of hypothalami, pituitary glands,  
144 and gonads were mapped to the Rock Dove reference HPG transcriptome using Salmon, which  
145 resulted in between 70% and 80% read mapping. These mapping data were imported into R  
146 and summarized into gene-level counts using tximport, after which, edgeR was used to  
147 generate normalized estimates of gene expression. Patterns of transcript-expression overlap  
148 are presented in Figure 1. Of the 15,102 genes expressed in the HPG, 7,529 are expressed in  
149 all tissues (median CPM > 10 - Figure 1). A total of 746 transcripts are expressed in the ovary,

150 hypothalamus, and pituitary, 732 are expressed uniquely in the testes, 529 uniquely in ovary,  
151 418 uniquely in the hypothalamus, and 230 uniquely in the pituitary. Dyads (genes expressed  
152 uniquely in pairs of tissues) follow an expected pattern, with the number of genes expressed  
153 uniquely in the gonads (testes and ovary) being more than the number of genes expressed  
154 uniquely in the pituitary and hypothalamus, followed by the pituitary and ovary, hypothalamus  
155 and ovary, pituitary and testes, and hypothalamus and testes. Understanding tissue-specific  
156 patterns of expression can provide a glimpse into the HPG axis as an interconnected functional  
157 system.

158  
159 A gene ontology-based pathway analysis<sup>27</sup> of the transcripts unique to each tissue provides  
160 some insights into the specific biological processes important to each tissue. Of the genes that  
161 are uniquely expressed in the testes, the three most highly represented pathways include  
162 Inflammation mediated by chemokine and cytokine signaling pathway (Panther pathway number  
163 P00031), CCKR signaling map (P06959) and Nicotinic acetylcholine receptor signaling pathway  
164 (P00044). The top three pathways for genes uniquely expressed in the ovary are related to  
165 Gonadotropin-releasing hormone receptor pathway (P06664), Wnt signaling pathway (P00057),  
166 and angiogenesis (P00005). Genes uniquely expressed in the hypothalamus cluster around the  
167 pathway terms oligodendrocyte differentiation, regulation of glial cell differentiation, positive  
168 regulation of synapse assembly, negative regulation of neurogenesis and modulation of  
169 synaptic transmission. The pituitary contains uniquely expressed genes related to the Wnt  
170 signaling pathway (P00057), the Cadherin signaling pathway (P00012), and the gonadotropin-  
171 releasing hormone receptor pathway (P06664).

172

173

174

175

176

177

178 Figure 1. Description of transcript presence overlap in the HPG axis. Bars are annotated by  
179 connected dots which indicate a given number of transcripts expressed in those tissues. For  
180 example, 746 transcripts are expressed in the pituitary, hypothalamus, and ovary, but these  
181 genes are not expressed in the testes. Bars annotated by single blue dots indicate the number  
182 of transcripts expressed uniquely in that tissue. For example, 732 transcripts are expressed only  
183 in the testes.

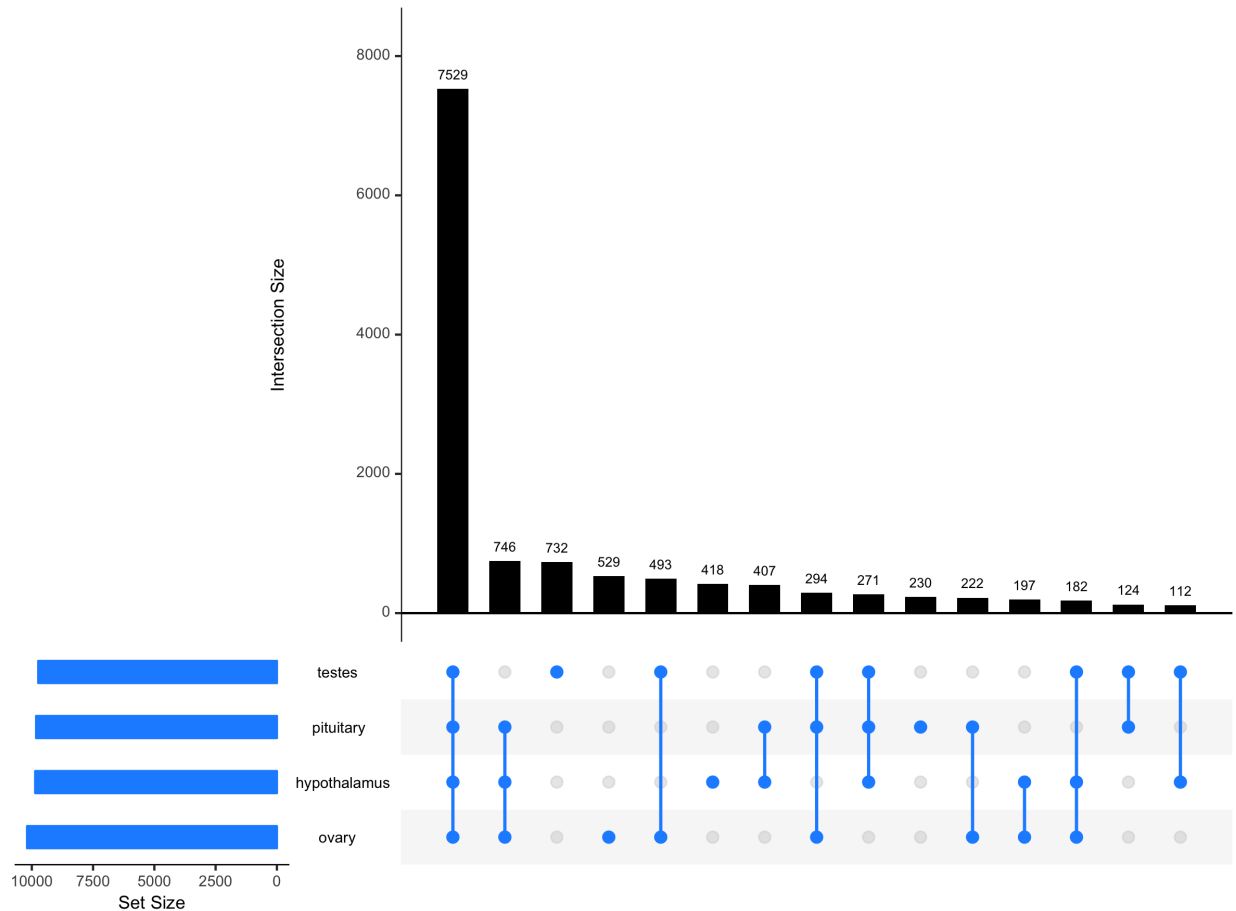

184

185

186

### 187 **Evaluation of Candidate Gene Expression.**

188 Using the assembled transcriptome, we characterized expression in males and females across  
189 the HPG axis (e.g., Figure 2). For the candidate genes evaluated, which include gonadotropin  
190 releasing hormone (*GnRH-1*) and its receptor (*GnRH-1-R*), LH receptor (*LH-R*), FSH receptor  
191 (*FSH-R*), androgen receptor (*AR*), estrogen receptor alpha and beta (*ESR alpha*, *ESR beta*). In  
192 addition, we examined gonadotropin inhibitory hormone (*GnIH*), due to its inhibitory effect on the  
193 HPG axis and reproductive behavior<sup>22</sup>, vasoactive intestinal peptide (*VIP*), due to its role in  
194 stimulating the release of the pituitary hormone, prolactin<sup>23</sup>, and its receptor (*VIP-R*), prolactin  
195 (*PRL*) due to its facilitation of parental care behaviors, including crop milk production<sup>24</sup>, and its  
196 receptor (*PRL-R*), arginine vasopressin-like receptor 1A and 1B (*AVPR1A*, *AVPR1B*),  
197 mesocin (*MT*) and its receptor (*MTR*), due to their role in social bonding behaviors<sup>25,26</sup>,  
198 progesterone receptor (*PGR*) due to its role in reproductive behavior<sup>27</sup>, CYP19, which encodes  
199 the aromatase enzyme (*ARO*), which is responsible for the conversion of testosterone into

200 estradiol<sup>28</sup>.

201  
202 Using a generalized linear model and least-squares means for post-hoc tests of significance  
203 ( $P < 0.05$ ), we uncovered greater expression of *GnRH-1-R*, *AR*, and *PGR* in the female pituitary  
204 as compared to the male pituitary (z-ratio 2.324, p-value = 0.0201; z ratio = -3.842, p-value =  
205 0.0001; z ratio = 5.559, p-value = <.0001, respectively). We also found greater expression of  
206 *PRL* in the female pituitary (z ratio = 2.912, p-value = 0.0036) as compared to the male pituitary,  
207 but *PRL* was more highly expressed in the male hypothalamus as compared to the female  
208 hypothalamus (z ratio = -2.433, p-value = 0.0150). The *PRL* receptor was also more highly  
209 expressed in the male hypothalamus and pituitary gland as compared to corresponding female  
210 tissues (z ratio -2.674, p-value = 0.0075 and z ratio -2.564, p-value = 0.0104, respectively).  
211 Finally, we discovered greater expression of *AVPR1A* in the male pituitary as compared to the  
212 female pituitary (z ratio = -2.416, p-value = 0.0157).

213

214

215

216

217

218

219

220

221

222

223

224

225

226

227

228 Figure 2A-F. Box and whisker plots illustrating the differential expression between the sexes of  
229 six candidate genes. The Y-axis indicates levels of gene expression as presented by taking the  
230 log of transcripts per million plus one (TPM+1) while tissue and sex are presented on the X-axis.  
231 The bottom and top of the box indicates the first and third quartiles. The band inside the box is  
232 the median. Whiskers indicate the 95% confidence intervals of the data. \*\* denotes statistically  
233 significant differences in expression.



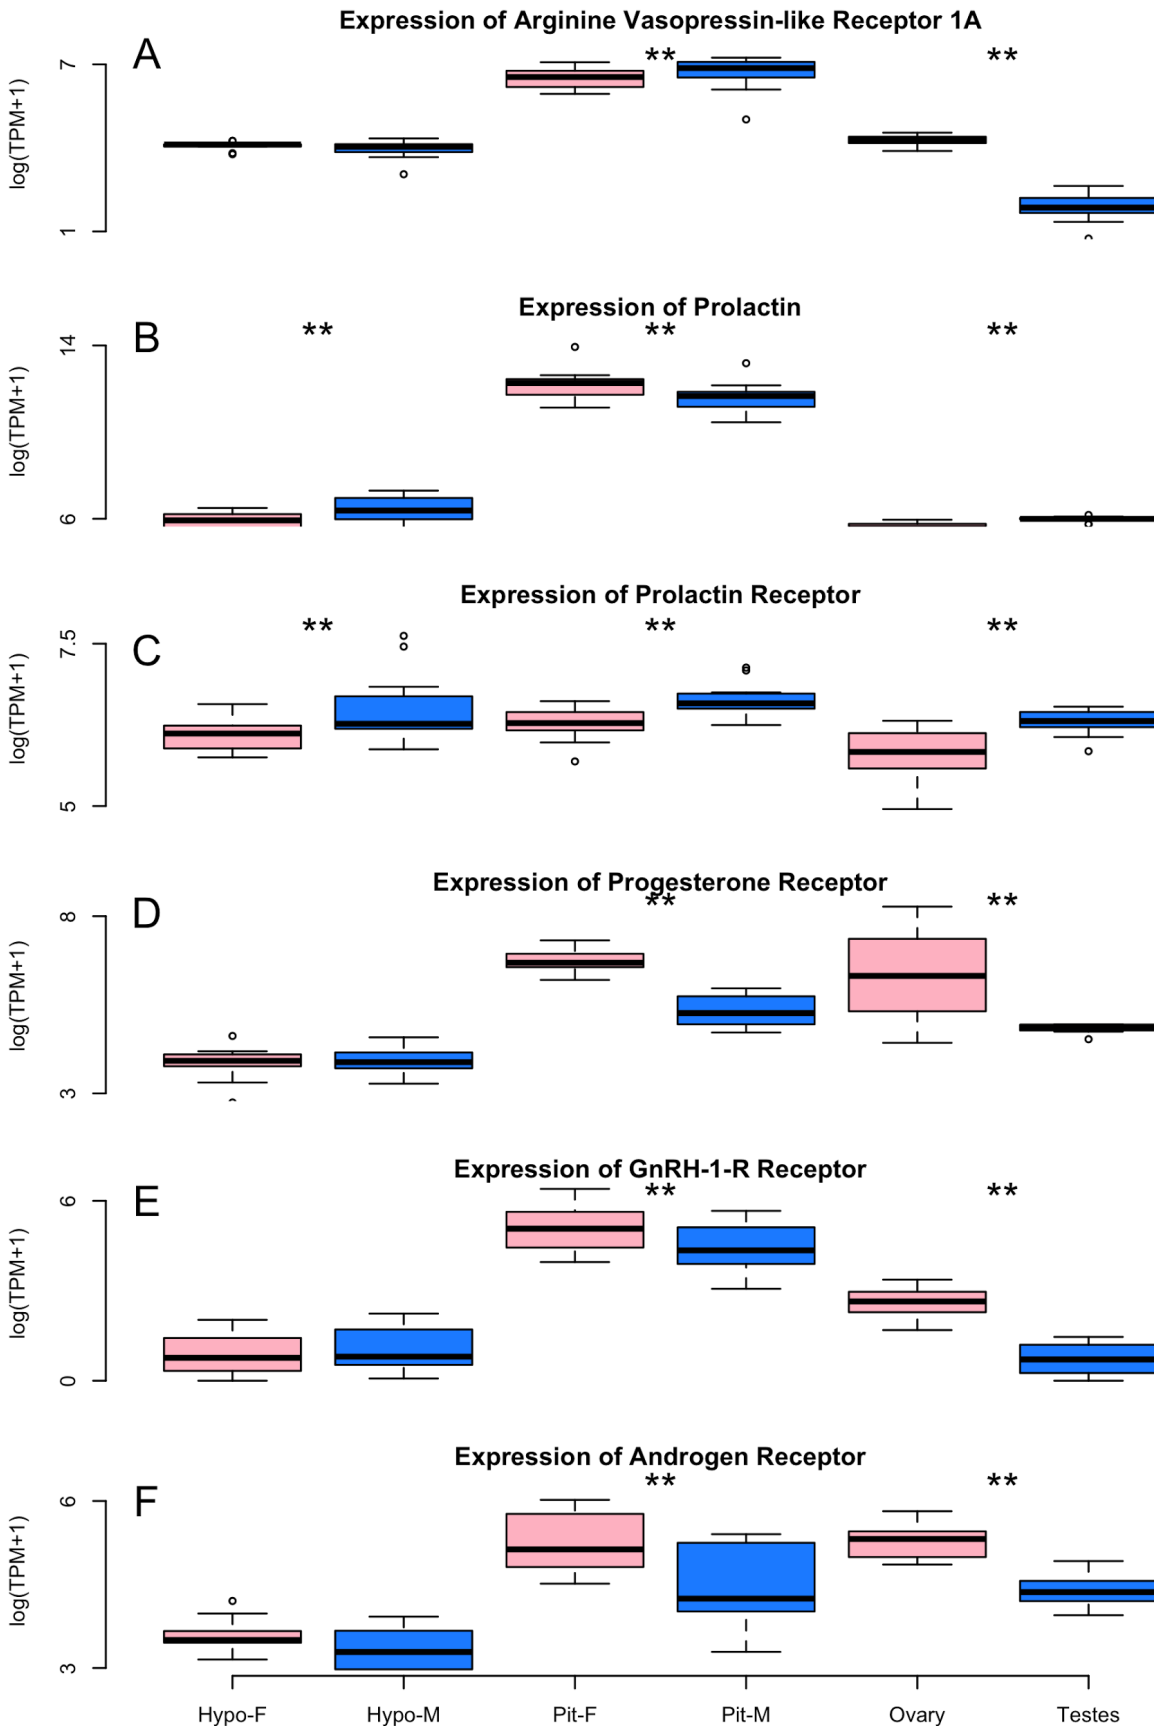

235 Table 3: Mean gene expression (normalized counts per million (CPM)) +/- standard deviation)  
 236 for a list of candidate genes known to be important mediators of reproductive biology.

| Gene            | Hypo             |                  | Pit                   |                       | Gonads           |                  |
|-----------------|------------------|------------------|-----------------------|-----------------------|------------------|------------------|
|                 | Female           | Male             | Female                | Male                  | Female           | Male             |
| <b>GnRH-I</b>   | 116.1 +/- 75.9   | 142.3 +/- 121.6  | 0.3 +/- 0.5           | 1.3 +/- 2.3           | 0.6 +/- 0.7      | 1.2 +/- 1.1      |
| <b>GnRH-I-R</b> | 2.34 +/- 2.67    | 2.85 +/- 2.75    | 245.6 +/- 212.4       | 112.8 +/- 83.76       | 14.0 +/- 6.7     | 1.38 +/- 1.09    |
| <b>LH-R</b>     | 19.0 +/- 11.3    | 23.03 +/- 12.2   | 0.9 +/- 0.95          | 0.38 +/- 0.67         | 264.45 +/- 77.54 | 42.59 +/- 39.1   |
| <b>FSH-R</b>    | 4.02 +/- 4.42    | 5.13 +/- 2.62    | 9.4 +/- 3.75          | 11.5 +/- 5.62         | 151.59 +/- 80.2  | 181.0 +/- 51.56  |
| <b>AR</b>       | 37.7 +/- 13.4    | 27.8 +/- 13.1    | 226.6 +/- 121.4       | 111.1 +/- 72.7        | 204.1 +/- 62.5   | 80.3 +/- 23.1    |
| <b>ERa</b>      | 49.2 +/- 14.0    | 57.2 +/- 18.6    | 724.5 +/- 329.3       | 836 +/- 283.4         | 166.2 +/- 152.5  | 64.6 +/- 32.6    |
| <b>ERb</b>      | 41.9 +/- 18.7    | 36.1 +/- 14.5    | 53.8 +/- 16.5         | 58.6 +/- 27.9         | 173.4 +/- 90.5   | 7.4 +/- 3.9      |
| <b>GnIH</b>     | 287.8 +/- 148.7  | 383.2 +/- 510.0  | 4.0 +/- 3.8           | 2.9 +/- 3.1           | 0.1 +/- 0.2      | 0.7 +/- 0.7      |
| <b>VIP</b>      | 1.3e+02 +/- 60.1 | 1.3e+02 +/- 98.3 | 1.19 +/- 1.37         | .46 +/- .77           | 1.3e+01 +/- 15.6 | 0 +/- 0          |
| <b>VIP-R</b>    | 70.78 +/- 18.5   | 69.2 +/- 24.5    | 47.3 +/- 141.5        | 376.35 +/- 134.64     | 42.3 +/- 17.3    | 18.8 +/- 7.9     |
| <b>PRL</b>      | 389.9 +/- 170.4  | 766.0 +/- 436.7  | 295840.2 +/- 320026.2 | 136607.5 +/- 121634.2 | 250.9 +/- 95.2   | 397.9 +/- 45.1   |
| <b>PRL-R</b>    | 463.0 +/- 141.7  | 803.4 +/- 558.4  | 540.4 +/- 143.2       | 790.85 +/- 204        | 338.5 +/- 131.8  | 550.66 +/- 100.7 |
| <b>AVPR1A</b>   | 117.3 +/- 58.8   | 98.3 +/- 34.4    | 202.2 +/- 111.3       | 362.2 +/- 181.6       | 19.0 +/- 13.5    | 3.2 +/- 2.3      |
| <b>AVPR1B</b>   | 5.4 +/- 5.4      | 5.4 +/- 3.1      | 1538.3 +/- 503.5      | 1900.1 +/- 709.1      | 3.8 +/- 1.3      | 2.3 +/- 1.5      |
| <b>MT</b>       | 264.9 +/- 82.1   | 206.9 +/- 101.1  | 173 +/- 39.9          | 172.78 +/- 60.9       | 182.11 +/- 265.4 | 11.1 +/- 2.98    |
| <b>MTR</b>      | <1               | <1               | <1                    | <1                    | <1               | <1               |
| <b>PGR</b>      | 50.6 +/- 24.6    | 51.4 +/- 20.8    | 874.4 +/- 294.9       | 216.7 +/- 82.6        | 1004.6 +/- 1193  | 126.7 +/- 14.4   |
| <b>CYP19</b>    | 212.6 +/- 137.5  | 325.8 +/- 200.2  | 26.4 +/- 10.3         | 49.5 +/- 20.2         | 786.6 +/- 446.2  | 1.7 +/- 1.3      |

237

### 238 **Global Evaluation of Gene Expression**

239 Analysis of global patterns of gene expression, aimed at uncovering previously unknown sex-  
 240 specific differences in gene expression in the hypothalamus and pituitary by examining the

241 entire transcriptome, was conducted using edgeR. After controlling for over 15,000  
242 comparisons, we normalized the count data using the TMM method <sup>29</sup>, which is done by finding  
243 a set of scaling factors for the library sizes that minimize the log-fold changes between the  
244 samples for most genes. This analysis revealed sex-specific differences in gene expression,  
245 particularly in the pituitary, where 218 genes were more highly expressed in males, while 153  
246 genes were more highly expressed in females (Figure 3). The five most differentially expressed  
247 genes are Zinc Finger AN1-Type Containing 5 (*ZFAND5*), Betacellulin (*BTC*) which appears to  
248 be responsive to LH <sup>30</sup>, Cbp/P300 Interacting Transactivator With Glu/Asp Rich Carboxy-  
249 Terminal Domain 4 (*CITED4*), Growth Regulation By Estrogen In Breast Cancer 1 (*GREB1*)  
250 which is regulated by estrogen <sup>31</sup>, and Kinesin Family Member 24 (*KIF24*). All had false  
251 discovery rates (FDR) < 7e-09. The full table of differentially expressed genes is available at  
252 <https://git.io/vXJWp>, which includes several tantalizing novel candidates, including Ecto-NOX  
253 Disulfide-Thiol Exchanger 1 (*ENOX1*; Fig. 4). In contrast to the pituitary, the hypothalamus  
254 exhibited only a single differentially expressed gene. That gene was potassium voltage-gated  
255 channel subfamily Q member 1 (*KCNQ1*, FDR =0.007). *KCNQ1*, which we found to be more  
256 highly expressed in females, is known to be imprinted (expressed in a parent-of-origin-specific  
257 manner) in mammals <sup>32</sup>.

258  
259 A number of expression patterns in the pituitary were identified by gene ontology analysis,  
260 which uses a controlled vocabulary to describe gene function and relationships between these  
261 terms. First, gene ontology terms that describe genes differentially expressed in the female  
262 pituitary (Table 4) are clustered around terms related to the binding of lipid-based hormones,  
263 immune function, growth, and development. Gene ontology terms from genes differentially  
264 expressed in male pituitary (Table 5) are clustered around terms related to muscles and  
265 movement.

266  
267  
268  
269  
270  
271  
272  
273  
274

275 Figure 3. MA plot for the *ab initio* comparison between genes differentially expressed in the  
276 male and female pituitary. Red dots indicate statistically different genes. Those with positive  
277 values on the log fold change (logFC) Y axis are more highly expressed in the male pituitary,  
278 while those with negative values are more highly expressed in the female pituitary. The x-axis is  
279 a measure of gene expression, with higher numbers indicating higher levels of gene expression.

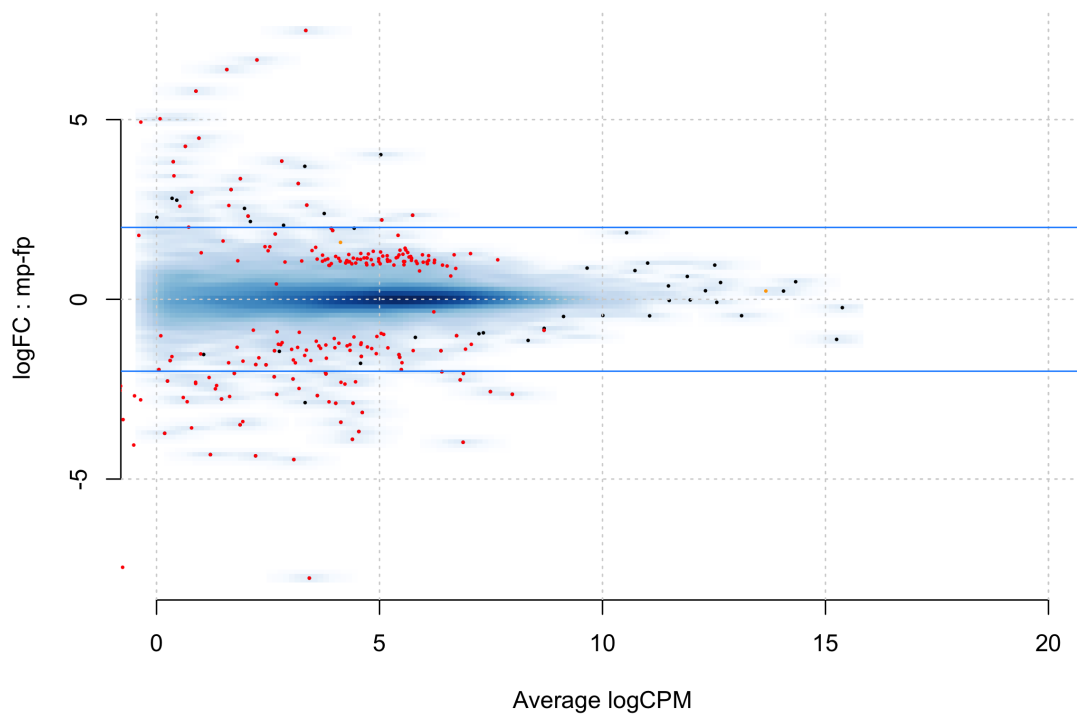

280  
281  
282  
283  
284  
285  
286  
287  
288  
289  
290  
291  
292

293 Figure 4. Box and whisker plots illustrating sex-biased expression of two genes, Betacellulin  
294 (*BTC*) and Ecto-NOX Disulfide-Thiol Exchanger 1 (*ENOX1*), identified using our global analysis.  
295 The Y-axis indicates levels of gene expression as presented by taking the log of transcripts per  
296 million plus one (TPM+1) while tissue and sex are presented on the X-axis. The bottom and top  
297 of the box indicates the first and third quartiles. The band inside the box is the median. Whiskers  
298 indicate the 95% confidence intervals of the data. \*\* denotes statistically significant differences  
299 in expression.

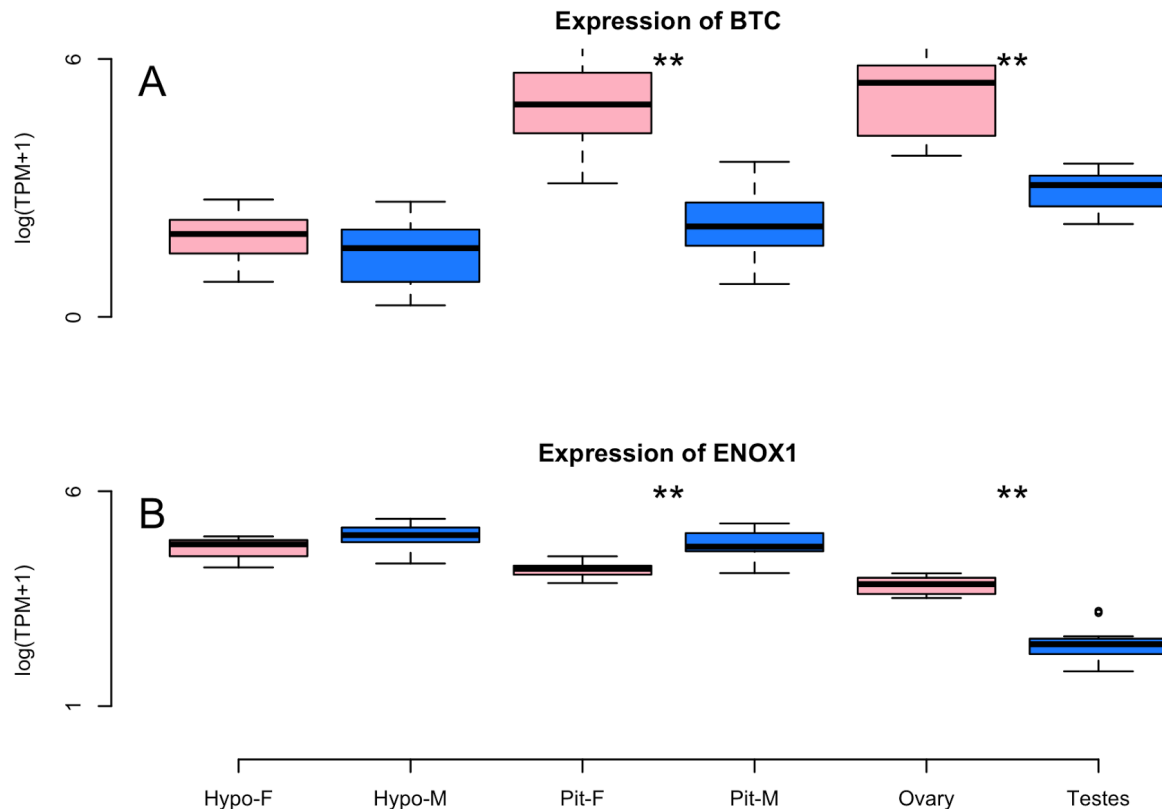

300

301

302 Table 4: **Top 20 Gene Ontology (GO) Terms** describing differentially expressed genes in the  
303 female pituitary gland. These terms describe the putative function of genes using a controlled  
304 vocabulary. Abbreviations: Ontology (Ont), Molecular Function (MF), Biological Processes  
305 (BP). N signifies the number of genes in the entire dataset that are linked to the specific  
306 ontology term. F+ indicates the number of differentially expressed genes significantly more  
307 highly expressed in the female pituitary, while M+ indicates the number of expressed genes  
308 significantly more highly expressed in the male pituitary. Results are limited to terms where the  
309 specific term contains >4 genes. In all cases, p-values are corrected for multiple hypothesis  
310 tests using the Bonferroni correction.

| GO number         | Term                                                  | Ont | N   | F+ | M+ | P-value  |
|-------------------|-------------------------------------------------------|-----|-----|----|----|----------|
| <b>GO:0008289</b> | lipid binding                                         | MF  | 50  | 6  | 1  | 1.92E-05 |
| <b>GO:0048469</b> | cell maturation                                       | BP  | 13  | 3  | 0  | 4.29E-04 |
| <b>GO:0021700</b> | developmental maturation                              | BP  | 18  | 3  | 0  | 1.18E-03 |
| <b>GO:0043178</b> | alcohol binding                                       | MF  | 7   | 2  | 0  | 2.93E-03 |
| <b>GO:0033293</b> | monocarboxylic acid binding                           | MF  | 8   | 2  | 0  | 3.88E-03 |
| <b>GO:0014066</b> | regulation of phosphatidylinositol 3-kinase signaling | BP  | 8   | 2  | 0  | 3.88E-03 |
| <b>GO:0006869</b> | lipid transport                                       | BP  | 27  | 3  | 2  | 3.92E-03 |
| <b>GO:0007548</b> | sex differentiation                                   | BP  | 27  | 3  | 0  | 3.92E-03 |
| <b>GO:0010876</b> | lipid localization                                    | BP  | 29  | 3  | 2  | 4.82E-03 |
| <b>GO:0048017</b> | inositol lipid-mediated signaling                     | BP  | 9   | 2  | 0  | 4.95E-03 |
| <b>GO:0014065</b> | phosphatidylinositol 3-kinase signaling               | BP  | 9   | 2  | 0  | 4.95E-03 |
| <b>GO:0048015</b> | phosphatidylinositol-mediated signaling               | BP  | 9   | 2  | 0  | 4.95E-03 |
| <b>GO:0005496</b> | steroid binding                                       | MF  | 9   | 2  | 0  | 4.95E-03 |
| <b>GO:0005319</b> | lipid transporter activity                            | MF  | 10  | 2  | 1  | 6.14E-03 |
| <b>GO:0043627</b> | response to estrogen                                  | BP  | 10  | 2  | 0  | 6.14E-03 |
| <b>GO:0004867</b> | serine-type endopeptidase inhibitor activity          | MF  | 12  | 2  | 0  | 8.86E-03 |
| <b>GO:0042698</b> | ovulation cycle                                       | BP  | 13  | 2  | 0  | 1.04E-02 |
| <b>GO:0022602</b> | ovulation cycle process                               | BP  | 13  | 2  | 0  | 1.04E-02 |
| <b>GO:0005102</b> | receptor binding                                      | MF  | 114 | 5  | 0  | 1.07E-02 |
| <b>GO:0046545</b> | development of primary female sexual characteristics  | BP  | 14  | 2  | 0  | 1.20E-02 |

311

312 Table 5: **Gene Ontology (GO) Terms** describing genes differentially expressed genes in the  
313 male pituitary gland. These terms describe the putative function of genes using a controlled  
314 vocabulary. Abbreviations: Ont= Ontology (Ont), MF (Molecular Function (MF), BP (Biological  
315 Processes (BP). N signifies= the number of genes in the entire dataset that are linked to the  
316 specific ontology term. F+ indicates the number of differentially expressed genes significantly  
317 more highly expressed in the female pituitary, while M+ indicates the number of expressed  
318 genes significantly more highly expressed in the male pituitary. Results are limited to terms  
319 where the specific term contains >4 genes. In all cases, p-values are corrected for multiple  
320 hypothesis tests using the Bonferroni correction.

| GO number  | Term                              | Ont | N   | F+ | M+ | P-value  |
|------------|-----------------------------------|-----|-----|----|----|----------|
| GO:0006936 | muscle contraction                | BP  | 21  | 0  | 4  | 3.90E-04 |
| GO:0006941 | striated muscle contraction       | BP  | 10  | 0  | 3  | 5.53E-04 |
| GO:0003012 | muscle system process             | BP  | 26  | 0  | 4  | 9.15E-04 |
| GO:0050879 | multicellular organismal movement | BP  | 4   | 0  | 2  | 1.77E-03 |
| GO:0050881 | musculoskeletal movement          | BP  | 4   | 0  | 2  | 1.77E-03 |
| GO:0003009 | skeletal muscle contraction       | BP  | 4   | 0  | 2  | 1.77E-03 |
| GO:0008092 | cytoskeletal protein binding      | MF  | 101 | 1  | 6  | 7.20E-03 |
| GO:0003779 | actin binding                     | MF  | 53  | 0  | 4  | 1.28E-02 |

321

## 322 Discussion

323

324 The HPG axis is a system comprised of endocrine tissues whose function is vital to the  
325 regulation of reproduction and associated behavior. Here, we report patterns of gene expression  
326 amongst tissues of the HPG axis as well as patterns of sex-biased gene expression within them.  
327 We describe patterns of tissue-specific expression and shared incidence of expression between  
328 tissues, providing an important picture of the functional-connectivity of these tissues. We also  
329 describe sex-biased patterns of gene expression for a set of candidate genes, currently known  
330 to play important roles in reproduction and associated behaviors. Lastly, we use an *ab initio*  
331 approach to identify all differentially expressed transcripts between male and female pituitary  
332 and hypothalamus. Our findings provide a vital resource for researchers examining the  
333 molecular basis of reproductive behavior and the mechanisms underlying fundamental  
334 physiological and behavioral differences in males and females.

335

336 ***The Columba livia HPG transcriptome.*** We present an HPG transcriptome that is substantially  
337 complete, with fewer than 10% of universal avian orthologs missing (Table 1). This number  
338 suggests that all, or nearly all, transcripts present in the avian HPG have been successfully  
339 reconstructed, and the missing avian orthologs may be expressed in tissues other than those  
340 studied here. The transcriptome is structurally sound, as is evident from its TransRate score  
341 of .41, with 90% of reads mapping concordantly to the assembled reference (Table 2).

342

343 ***Evaluation of Candidate Gene Expression.*** Decades of previous research describing the

344 HPG axis and its role in reproductive biology have elucidated much of the molecular machinery  
345 underlying phenotypes<sup>33</sup>. Based on this previous work, we targeted well-known substrates  
346 involved in the facilitation and mediation of reproductive processes and their associated  
347 behaviors for investigation (Table 3). Other genes not highlighted here can be found at  
348 <https://git.io/vXJW>.

349  
350 We discovered previously unrecognized sex-specific differences in several of these candidate  
351 genes. Arginine vasopressin-like receptor 1A (*AVPR1A*) is known to be implicated in  
352 reproductive behaviors such as pair-bonding and parental care<sup>34–37</sup>. *AVPR1A* is most highly  
353 expressed in the pituitary, followed by the ovary, the hypothalamus, and lastly the testes. We  
354 found statistically significant differences in expression of this gene in the pituitary, with  
355 expression of this gene to be 1.8x higher in males as compared to females. Although a small  
356 number of studies have investigated sex-specific differences in gene expression<sup>38–40</sup>, including  
357 one in which expression in males was linked to pair-bond formation<sup>41</sup>, it is not well known if  
358 *AVPR1A* is differentially expressed by sex. As fields of behavior and genomics further integrate,  
359 links between sex-specific roles in pair-bonding and reproductive behavior in the context of  
360 corresponding differences in gene expression will transform the way we understand how  
361 behavior is regulated.

362  
363 We also investigated other candidate genes involved in reproduction and associated behaviors.  
364 Prolactin (*PRL*) is an important promoter of parental care, promoting lactation<sup>42</sup> and related to  
365 appetite and weight gain<sup>43</sup>. We found *PRL* to be more highly expressed in the male  
366 hypothalamus as compared to the female hypothalamus. The receptor for prolactin (*PRL-R*)  
367 was also more highly expressed in the male hypothalamus and pituitary as compared to  
368 females. In contrast, *PRL* was more highly expressed in the female pituitary as compared to the  
369 male pituitary. Though this species exhibits bi-parental care, including the production of crop  
370 milk by both males and females, neither sex was caring for eggs or chicks at the time of  
371 collection to help control for potential reproductive stage confounds. However, the interesting  
372 sexually-biased differences we note in inter-tissue gene expression inspires the question as to  
373 whether *PRL* is regulated in a sex-specific manner to produce a sex-specific result? Or, despite  
374 the difference in location of expression, does *PRL* activation lead to sexually monomorphic  
375 prolactin-mediated reproductive processes and behaviors? In other words, the differences  
376 observed in underlying genetic expression between the sexes may converge to the same  
377 behavioral endpoint, permitting certain factors in one sex to offset the effects in the other,



378 making the sexes more similar<sup>44</sup>. Post our discovery that *PRL* expression differs relative to sex  
379 and tissue of the HPG axis, the next step would be to investigate how the action of *PRL* on each  
380 of these tissues manifests in males versus females.

381

382 In addition, we found *GnRH-1-R*, *AR*, and *PRG* to be more highly expressed in the female  
383 pituitary as compared to the male pituitary. GnRH-1, produced in the hypothalamus, is a major  
384 mediator of gonadotropin release in the pituitary. These gonadotropins signal the gonads to  
385 produce androgens, which feedback onto androgen receptors along the HPG axis. We found  
386 that androgen receptors are more highly expressed in females as compared to males. Females  
387 tend to have lower circulation of androgens than males, so could this be a way to increase  
388 sensitivity to androgen signals in females? Finally, progesterone receptor is associated with the  
389 mediation of female breeding cycles<sup>45</sup>, but it can also serve as an important precursor to the  
390 creation of multiple hormones in males and females, including testosterone and estradiol. We  
391 found that the androgen receptor is more highly expressed in the female pituitary relative to the  
392 male pituitary. While expression in both sexes has been linked to reproductive development<sup>46–</sup>  
393<sup>48</sup>, to our knowledge, sex differences in expression have never been reported. To better  
394 elucidate the phenomenon of these sexually-dimorphic genetic expression phenotypes, further  
395 studies of functional genomics are required. Indeed, study of the most well-characterized  
396 candidate genes underlying reproductive behavior could reveal important and previously  
397 unrecognized sex-differences in expression. As the field of behavioral genomics advances,  
398 important questions to ask will be, are these differences biologically relevant, and if so, how do  
399 differences in expression lead to differences in behavior and reproductive output? Future work  
400 focused on these relationships will significantly shape our understanding of the molecular  
401 mechanisms underlying the observed patterns.

402

403 **Global Evaluation of Gene Expression.** Avian reproductive behavior has been shown to be  
404 heavily influenced by the endocrine function of the hypothalamus, pituitary, and gonads.  
405 Although sex-biased differences in vertebrate reproductive behavior have been well-noted, data  
406 on sex-specific patterns of gene expression that could be influencing these behaviors are  
407 lacking. This may largely be due to the novelty of various genomic technologies and the  
408 expense of collecting such data. However, it is becoming increasingly feasible and affordable to  
409 conduct such studies, making possible the potential for a more integrative understanding of  
410 reproductive behavior<sup>3</sup>. Thus, in addition to investigating sexually dimorphic candidate gene  
411 expression in the HPG axis, we used an *ab initio* RNAseq approach to explore differences in *all*

412 sexually dimorphic HPG gene expression in each tissue. The newly discovered sex-biased  
413 genetic differences that we report have the potential to offer a more in-depth picture of sexual  
414 dimorphism at the molecular level.

415  
416 To conduct a global analysis of gene expression, we compared levels of expression in the  
417 tissues of the HPG axis shared by both sexes, the pituitary glands and hypothalami. Unlike our  
418 previous analyses where we targeted genes of interest, here we analyzed all genes expressed,  
419 controlling for over 15,000 multiple comparisons. We uncovered 361 sex-based differentially-  
420 expressed genes in the pituitary: 218 were more highly expressed in males, while 153 were  
421 more highly expressed in females. A table detailing differences in expression of all expressed  
422 genes, including those statistically and non-statistically differentially expressed, can be  
423 accessed at <https://git.io/vXJWp>. In contrast, only a single gene, the potassium voltage-gated  
424 channel subfamily Q member 1 (*KCNQ1*), was statistically differentially expressed in the  
425 hypothalamus (full table available here <https://git.io/vXJW5>). This profound disparity in patterns  
426 of differential expression between hypothalamic and pituitary tissues begs a question of function  
427 - how do the different tissues of the HPG axis contribute to physiological and behavioral  
428 differences between males and females? Is the pituitary more involved in the maintenance of  
429 sex-specific physiology and behavior than the hypothalamus? Studies comparing gene  
430 expression in males and females are rare - most often studies have combined the sexes (but  
431 see <sup>38-40,49-54</sup>). However, Nishida and colleagues <sup>39</sup> found similar patterns of gene expression in  
432 mice, reporting that 43 genes were more highly expressed in the female pituitary while only 3  
433 were more highly expressed in the hypothalamus as compared to males. Could this pattern of  
434 sex-biased expression be conserved across vertebrates, and if so, can we conclude that the  
435 pituitary, more so than the hypothalamus, plays a greater role in the maintenance of sex-specific  
436 reproductive physiology and behavior?

437  
438 Another hypothesis as to why we may observe less differential expression at the level of the  
439 hypothalamus is because of the high heterogeneity of the region, which could result in the  
440 dilution of observable differences in gene expression existing in more discrete locations. On the  
441 other hand, high heterogeneity of the hypothalamus might only mask results of differential  
442 expression if individual nuclei express antiparallel sex-specific changes, resulting in an  
443 averaging of gene expression signals. Given this particular scenario is likely to be exceptionally  
444 rare, it is possible that nuclei heterogeneity of the hypothalamus does not contribute significantly  
445 to the observed patterns, though future investigations may yield more telling data if specific

446 nuclei are examined within the hypothalamus.

447

448 Gene ontology (GO) analysis of the differential expression in the pituitary revealed interesting  
449 patterns of enrichment, or patterns of gene expression related to a common biological function  
450 or process. GO terms enriched for genes expressed more highly in males were often related to  
451 motor or muscle function, with specific terms such as muscle contraction being more highly  
452 expressed in males as compared to females. The differentially expressed genes linked to these  
453 GO terms include *Myosin* and other components of the myosin actin skeleton. Previous  
454 research has identified a potential role for myosin in the pituitary, including in its primary function  
455 of secretion<sup>55-57</sup>. For example, GnRH-induced secretion of LH can be altered by manipulating  
456 the action of myosin in the anterior pituitary<sup>56</sup>. In females, a surge in LH will trigger ovulation.  
457 We were unable to control for the specific ovulatory stage of the females sampled, though by  
458 chance we can assume that most were not sampled at the exact point they were experiencing  
459 their LH surge. However, males were sexually mature and actively paired with female partners  
460 at the time of sampling. In males, LH stimulates Leydig cell production of testosterone. Thus,  
461 one explanation for having GO term enrichment for genes more highly expressed in males  
462 under this label of motor control is that the male pituitary could be more sensitive to the GnRH  
463 signal to stimulate LH release due to myosin-related actions. The biological relevance of sex-  
464 specific differential expression of *Myosin* remains unknown and deserves future study.

465

466 Gene ontology terms enriched for genes expressed more highly in the female pituitary were  
467 often related to aspects of female growth and development. This may be due to their varying  
468 stages of follicular development. Females, unlike males, must grow and maintain follicles and  
469 the oviduct, which is energetically costly<sup>59</sup>. In a passerine species, females increased their  
470 resting metabolic rate by 22% during egg laying, of which 18% was attributed to maintenance of  
471 the oviduct<sup>59</sup>. While birds in our study were not actively nesting, we could not control for  
472 reproductive stage of the gonads. When we extracted female gonads, we found that they were  
473 experiencing different stages of follicular development. Some birds had regressed follicles, but  
474 many had a follicular hierarchy. The presence of follicular hierarchy could explain the presence  
475 of gene ontologies related to ovulation. Similarly, lipid binding and transport may be associated  
476 with follicular development because females are laying down lipid-rich yolk. On the other hand,  
477 males never had regressed testes. The active state of the male gonads is typical of pigeons  
478 who breed year-round, except for a brief photorefractory period in the North temperate fall  
479 where they may regress<sup>60</sup>. Gonads of females are more plastic and vary with the presence of

480 suitable mates and breeding stage<sup>60</sup>.

481

482 Using the global analysis approach, we were able to identify sex-biased differentially expressed  
483 genes that have not previously been targeted for investigation of HPG function. Such findings  
484 that are yielded from this discovery-based approach offer promising targets for future study,  
485 inspiring new lines of investigation<sup>3</sup>. One particularly promising target for understanding sex  
486 differences in reproductive biology is Betacellulin (*BTC*), which is highly expressed in the female  
487 pituitary as compared to the male pituitary (4.4 FC - Figure 4A). *BTC* is an epidermal-like growth  
488 hormone known to regulate female reproduction<sup>61</sup> via mediation of LH<sup>30</sup> and regulation of  
489 progesterone receptors<sup>62</sup>. In addition to being differentially expressed in the pituitary, it is also  
490 highly expressed in the female ovary, but not the hypothalamus. It is lowly expressed, but  
491 present in all male tissues, which begs the question, what role could *BTC* have in male  
492 reproductive physiology, if any?

493

494 The Ecto-NOX Disulfide-Thiol Exchanger 1 (*ENOX1*) gene, an electron transport gene, is more  
495 highly expressed in the male pituitary relative to the female pituitary (1.2x FC - Figure 4B). This  
496 gene, known to be involved in circadian rhythms<sup>63</sup>, has also been associated with weight gain  
497<sup>64</sup>, litter size in the pig<sup>65</sup>, and eggshell thickness in a genome-wide association study (GWAS) of  
498 chickens<sup>66</sup>. What role this gene plays in the pituitary, and specifically in the male pituitary,  
499 where it is differentially expressed, is completely unclear. Further work aimed at understanding  
500 this and the other differentially expressed genes can be the key to gaining the most complete  
501 understanding yet of how the HPG axis functions.

502

### 503 **Summary**

504 Researchers have described many important characteristics of the molecular basis for  
505 reproductive behaviors, including the characterization of multiple genes expressed in the HPG  
506 axis that are critical to reproduction. Our sex-specific, global analyses have uncovered hundreds  
507 of sexually-biased genes. These genes can provide novel clues to assist behavioral biologists  
508 and functional genomicists in more fully understanding the mechanisms underlying sexual  
509 dimorphism in reproductive behaviors. Indeed, future work can now use this information to  
510 better understand causal relationships and functions of genes expressed differently in males  
511 and females.

512

513 In conclusion, we reveal patterns of tissue specific and sexually dimorphic gene expression in

514 the HPG axis. We report sex-biased expression in genes commonly investigated when studying  
515 reproduction. In addition, we offer up promising new targets of investigation that could lead to a  
516 better understanding of HPG function in both sexes. Our results highlight the need for sex parity  
517 in transcriptomic studies, providing new lines of investigation of the mechanisms of reproductive  
518 function.

519

## 520 **Methods**

521

### 522 ***Animal Collection Methods***

523 Birds were housed at the University of California, Davis, in large, outdoor aviaries (5'x4'x7'), with  
524 8 sexually reproductive adult pairs per aviary. All birds were three years old and had been  
525 housed in their respective aviaries for one year at the time of collection. All birds were also  
526 successful breeders, having paired naturally and produced multiple clutches throughout the year  
527 thus far. However, to control for reproductive stage as much as was possible, all birds used in  
528 this study were sampled at a time when they were naturally without eggs or chicks, creating a  
529 type of "baseline" sampling point. All sampling occurred during late fall of 2015 and winter of  
530 2016 between 10:00-12:00 (PST) to avoid potential seasonal and circadian rhythm confounds.  
531 While birds were exposed to natural light, we also augmented their aviaries with artificial lights  
532 set to 14L:10D photoperiod in order to maintain reproductive condition. All methods were carried  
533 out in accordance with relevant guidelines and regulations, and all experimental protocols were  
534 approved by the University of California, Davis, IACUC (#18895). Fourteen males and ten  
535 females were sacrificed within 3 min of entering their aviary. They were anesthetized using  
536 isoflurane prior to decapitation. Brains, pituitaries, and gonads were extracted and immediately  
537 placed on dry ice and transferred within the hour to a -80°C freezer until further processing.  
538 Frozen brains were coronally sectioned on a cryostat (Leica CM 1860) at 100µM and the  
539 hypothalamus was isolated using surgical punches. We used Karten and Hodos' stereotaxic  
540 atlas<sup>67</sup> of the brain of the pigeon to locate the hypothalamus and collect it in its entirety. In brief,  
541 we, collected hypothalamic tissue beginning at the point of bifurcation of the tractus  
542 septomesencephalicus and ending after the cerebellum was well apparent. Hypothalamic,  
543 pituitary, and gonadal tissue were preserved at -80°C in RNALater and shipped from the  
544 University of California, Davis, to the University of New Hampshire for further processing.

545

### 546 ***Library Preparation and Sequencing***

547 Tissues frozen in RNALater were thawed on ice in an RNase-free work environment. Total RNA

548 was extracted using a standard Trizol extraction protocol (Thermo Fisher Scientific, Waltham,  
549 MA). The quality of the resultant extracted total RNA was characterized using the TapeStation  
550 2200 instrument (Agilent, Santa Clara, CA), after which Illumina sequence libraries were  
551 prepared using the TruSeq RNA Stranded LT Kit (Illumina). The TapeStation was, again, used  
552 to determine the quality and concentration of these libraries. Each library was diluted to 2nM  
553 with sterile ddH<sub>2</sub>O, and pooled in a multiplexed library sample. The multiplexed library sample  
554 was then sent to the New York Genome Center for 125 or 150 base pair paired-end sequencing  
555 on a HiSeq 2500 platform.

556

### 557 **Sequence Quality Control and Assembly**

558 Sequence read data were downloaded and quality checked using FastQC version 0.11.5<sup>68</sup>. A  
559 *de novo* transcriptome for the HPG was assembled following the Oyster River Protocol for  
560 Transcriptome Assembly<sup>69</sup>. In brief, 59 million paired end reads from two individuals (1 male  
561 and 1 female) were error corrected using RCorrector version 1.0.2<sup>70</sup>. Adapters, as well as  
562 bases with a Phred score <2 were trimmed using Skewer 0.2.2<sup>71</sup>, and assembly was carried out  
563 using Trinity version 2.2.0<sup>72</sup>, Binpacker version 1.0<sup>73</sup>, and Shannon version 0.0.2<sup>74</sup>, after which  
564 the resultant transcriptomes were merged using the software package transfuse version 0.5.0  
565 (<https://github.com/cbournnell/transfuse>). Lowly expressed transcripts, defined as those with an  
566 abundance of less than 0.5 transcript-per-million (TPM<0.5), were filtered out of the dataset.  
567 The resultant assembly was annotated using the software package dammit  
568 (<https://github.com/camillescott/dammit>), and evaluated using BUSCO 2.0 beta 3<sup>75</sup> and  
569 TransRate version 1.0.1<sup>76</sup>.

570

571 **Mapping and Differential Gene Expression** All samples were used (20 hypothalamus (11  
572 male, 9 female), 23 pituitary (14 male, 9 female), 13 testes, and 10 ovary samples from 24  
573 birds.) Raw reads were mapped to the annotated transcriptome after a quasi-mapping index  
574 was prepared using Salmon 0.7.0<sup>77</sup>. Rock dove transcripts were mapped to genes from the  
575 *Gallus gallus* genome version 5, using BLAST<sup>78</sup>. All data were then imported into the R  
576 statistical package (version 3.3.0)<sup>79</sup> using tximport<sup>80</sup> for gene level evaluation of gene  
577 expression, which was calculated using edgeR (version 3.1.4)<sup>81</sup> following TMM normalization  
578 and correction for multiple hypothesis tests by setting the false discovery rate (FDR) to 1%.

579

### 580 **Gene Expression Evaluation**

581 Although excellent genomic resources exist for the Rock Dove<sup>17</sup>, [the current Rock Dove](#)

582 [genome available lacks functional annotation \(e.g., gene ontology terms, information about](#)  
583 [function and protein networks\)](#). Thus, we elected to establish orthologous relationships between  
584 transcript sequences we generated in Rock Dove with those from the *Gallus gallus* genome,  
585 version 5.

586  
587 Patterns of gene expression were evaluated using two distinct methods. First, we selected a  
588 *priori* genes of interest based on their known involvement in reproduction and associated  
589 behaviors (Table 3). Differences in gene expression were evaluated between these genes in the  
590 hypothalamic, pituitary, and gonadal tissues and between both sexes using a generalized linear  
591 model framework (expression ~ sex \* tissue) with post-hoc significance for all pairwise  
592 combinations of factors tested using the Bioconductor package lsmmeans ([https://cran.r-](https://cran.r-project.org/package=lsmmeans)  
593 [project.org/package=lsmmeans](https://cran.r-project.org/package=lsmmeans)). Second, a more global investigation of differential expression  
594 was conducted to characterize the general presence and expression of all genes per tissue and  
595 how they might differ between the sexes. A comparison of differential expression between  
596 tissues was not carried out secondary to results from preliminary analysis suggesting that most  
597 genes are expressed differently, thus, making meaningful comparisons uninformative. Instead,  
598 to characterize patterns of expression in each tissue, we generated a transcript  
599 presence/absence matrix (1=present, 0=absent) using median CPM (counts-per-million,  
600 generated in edgeR) > 10 as the metric. Overlaps were visualized using the R package UpSet  
601 <sup>82</sup>. Gene ontology enrichment analysis was carried out using the Kolmogorov-Smirnov test <sup>83</sup> for  
602 significance in the R package, topGO <sup>84</sup>.

603

#### 604 **Acknowledgements:**

605 This work is supported by NSF IOS 1455960 to RMC and MM. We thank Jesse Krause,  
606 Jonathan Pérez, and members of the Calisi Lab for their help in maintaining the rock dove  
607 aviaries and aiding in tissue collection. We also thank Stacia Sower, Samuel Díaz-Muñoz,  
608 and the University of California, Davis, Environmental Endocrinology Group (EEG),  
609 comprised of the labs of Rebecca Calisi, Tom Hahn, Marilyn Ramenofsky, Karen Ryan, and  
610 John Wingfield, for their comments on this project and manuscript. We are grateful to  
611 Natalia Duque for her illustration (Fig. 1).

612

#### 613 **Author Contribution Statements**

614 Matthew MacManes and Andrew Lang constructed sequencing libraries, did bioinformatics  
615 analyses, and wrote the paper. Suzanne H. Austin, April Booth, Victoria Farrar and Rebecca  
616 Calisi conducted live animal experiments and wrote the paper.

617

618 **Additional Information**

619 Read data is available at PRJEB16136

620

621 **Competing Financial Interests**

622 The authors declare no competing financial interests.

623

624

625 **REFERENCES**

- 626 1. Sower, S. A., Freamat, M. & Kavanaugh, S. I. The origins of the vertebrate hypothalamic–  
627 pituitary–gonadal (HPG) and hypothalamic–pituitary–thyroid (HPT) endocrine systems:  
628 New insights from lampreys. *Gen. Comp. Endocrinol.* **161**, 20–29 (2009/3).
- 629 2. Plachetzki, D. C., Tsai, P.-S., Kavanaugh, S. I. & Sower, S. A. Ancient origins of metazoan  
630 gonadotropin-releasing hormone and their receptors revealed by phylogenomic analyses.  
631 *Gen. Comp. Endocrinol.* **234**, 10–19 (2016).
- 632 3. Calisi, R. M. & MacManes, M. D. RNAseq-ing a more integrative understanding of animal  
633 behavior. *Current Opinion in Behavioral Sciences* **6**, 65–68 (2015).
- 634 4. Lake, J. I., Lange, H. S., O'Brien, S., Sanford, S. E. & Maney, D. L. Activity of the  
635 hypothalamic-pituitary-gonadal axis differs between behavioral phenotypes in female white-  
636 throated sparrows (*Zonotrichia albicollis*). *Gen. Comp. Endocrinol.* **156**, 426–433 (2008).
- 637 5. Dhillon, W. S. *et al.* Kisspeptin-54 stimulates the hypothalamic-pituitary gonadal axis in  
638 human males. *J. Clin. Endocrinol. Metab.* **90**, 6609–6615 (2005).
- 639 6. Saldanha, C. J., Walters, B. J. & Fraley, G. S. Neurons that co-localize aromatase- and  
640 kisspeptin-like immunoreactivity may regulate the HPG axis of the Mallard drake (*Anas*  
641 *platyrhynchos*). *Gen. Comp. Endocrinol.* **166**, 606–613 (2010).
- 642 7. Wang, R.-L., Bencic, D., Lazorchak, J., Villeneuve, D. & Ankley, G. T. Transcriptional



- 643 regulatory dynamics of the hypothalamic-pituitary-gonadal axis and its peripheral pathways  
644 as impacted by the 3-beta HSD inhibitor trilostane in zebrafish (*Danio rerio*). *Ecotoxicol.*  
645 *Environ. Saf.* **74**, 1461–1470 (2011).
- 646 8. Zhang, X. *et al.* Real-time PCR array to study effects of chemicals on the Hypothalamic-  
647 Pituitary-Gonadal axis of the Japanese medaka. *Aquat. Toxicol.* **88**, 173–182 (2008).
- 648 9. Qin, F. *et al.* Gene expression profiling of key genes in hypothalamus-pituitary-gonad axis  
649 of rare minnow *Gobiocypris rarus* in response to EE2. *Gene* **552**, 8–17 (2014).
- 650 10. Han, H. *et al.* Fluoride exposure changed the structure and the expressions of reproductive  
651 related genes in the hypothalamus-pituitary-testicular axis of male mice. *Chemosphere* **135**,  
652 297–303 (2015).
- 653 11. Peterson, M. P. *et al.* De novo transcriptome sequencing in a songbird, the dark-eyed junco  
654 (*Junco hyemalis*): genomic tools for an ecological model system. *BMC Genomics* **13**, 305  
655 (2012).
- 656 12. Cánovas, A. *et al.* Multi-tissue omics analyses reveal molecular regulatory networks for  
657 puberty in composite beef cattle. *PLoS One* **9**, e102551 (2014).
- 658 13. Xu, J. *et al.* Defining global gene expression changes of the hypothalamic-pituitary-gonadal  
659 axis in female sGnRH-antisense transgenic common carp (*Cyprinus carpio*). *PLoS One* **6**,  
660 e21057 (2011).
- 661 14. Lehrman, D. S. The Physiological Basis of Parental Feeding Behavior in the Ring Dove  
662 (*Streptopelia risoria*). *Behaviour* **7**, 241–285 (1955).
- 663 15. Ball, G. F. & Silver, R. Timing of incubation bouts by ring doves (*Streptopelia risoria*). *J.*  
664 *Comp. Psychol.* **97**, 213–225 (1983).
- 665 16. Gillespie, M. J. *et al.* Transcriptome analysis of pigeon milk production  role of  
666 cornification and triglyceride synthesis genes. *BMC Genomics* **14**, 1–1 (2013).
- 667 17. Shapiro, M. D. *et al.* Genomic Diversity and Evolution of the Head Crest in the Rock  
668 Pigeon. *Science* **339**, 1063–1067 (2013).

- 669 18. Domyan, E. T. & Shapiro, M. D. Pigeonetics takes flight: Evolution, development, and  
670 genetics of intraspecific variation. *Dev. Biol.* (2016). doi:10.1016/j.ydbio.2016.11.008
- 671 19. Waterhouse, R. M., Tegenfeldt, F., Li, J., Zdobnov, E. M. & Kriventseva, E. V. OrthoDB: a  
672 hierarchical catalog of animal, fungal and bacterial orthologs. *Nucleic Acids Res.* **41**, D358–  
673 65 (2013).
- 674 20. Saier, M. H., Jr, Tran, C. V. & Barabote, R. D. TCDB: the Transporter Classification  
675 Database for membrane transport protein analyses and information. *Nucleic Acids Res.* **34**,  
676 D181–6 (2006).
- 677 21. Griffiths-Jones, S. *et al.* Rfam: annotating non-coding RNAs in complete genomes. *Nucleic*  
678 *Acids Res.* **33**, D121–4 (2005).
- 679 22. Calisi, R. M. An integrative overview of the role of gonadotropin-inhibitory hormone in  
680 behavior: Applying Tinbergen’s four questions. *Gen. Comp. Endocrinol.* **203**, 95–105  
681 (2014).
- 682 23. Cloues, R., Ramos, C. & Silver, R. Vasoactive intestinal polypeptide-like immunoreactivity  
683 during reproduction in doves: influence of experience and number of offspring. *Horm.*  
684 *Behav.* **24**, 215–231 (1990).
- 685 24. Silver, R. Prolactin and parenting in the pigeon family. *J. Exp. Zool.* **232**, 617–625 (1984).
- 686 25. Ondrasek, N. R. Emerging Frontiers in Social Neuroendocrinology and the Study of  
687 Nonapeptides. *Ethology* **122**, 443–455 (2016).
- 688 26. Kelly, A. M. & Goodson, J. L. Hypothalamic oxytocin and vasopressin neurons exert sex-  
689 specific effects on pair bonding, gregariousness, and aggression in finches. *Proc. Natl.*  
690 *Acad. Sci. U. S. A.* **111**, 6069–6074 (2014).
- 691 27. Liley, N. R. The role of estrogen and progesterone in the regulation of reproductive  
692 behaviour in female ring doves ( *Streptopelia risoria* ) under long vs. short photoperiods.  
693 *Can. J. Zool.* **54**, 1409–1422 (1976).
- 694 28. Balthazart, J. & Ball, G. *Brain Aromatase, Estrogens, and Behavior.* (OUP USA, 2012).

- 695 29. McCarthy, D. J., Chen, Y. & Smyth, G. K. Differential expression analysis of multifactor  
696 RNA-Seq experiments with respect to biological variation. *Nucleic Acids Res.* **40**, 4288–  
697 4297 (2012).
- 698 30. Park, J.-Y. *et al.* EGF-like growth factors as mediators of LH action in the ovulatory follicle.  
699 *Science* **303**, 682–684 (2004).
- 700 31. Ghosh, M. G., Thompson, D. A. & Weigel, R. J. PDZK1 and GREB1 are estrogen-regulated  
701 genes expressed in hormone-responsive breast cancer. *Cancer Res.* **60**, 6367–6375  
702 (2000).
- 703 32. Lee, M. P., Hu, R. J., Johnson, L. A. & Feinberg, A. P. Human KVLQT1 gene shows tissue-  
704 specific imprinting and encompasses Beckwith-Wiedemann syndrome chromosomal  
705 rearrangements. *Nat. Genet.* **15**, 181–185 (1997).
- 706 33. Nelson & Kriegsfeld. *Introduction to Behavioral Endocrinology.* (Sinauer, 2017).
- 707 34. Castelli, F. R., Kelley, R. A., Keane, B. & Solomon, N. G. Female prairie voles show social  
708 and sexual preferences for males with longer avpr1a microsatellite alleles. *Anim. Behav.*  
709 **82**, 1–10 (2011).
- 710 35. Staes, N. *et al.* Chimpanzee sociability is associated with vasopressin (Avpr1a) but not  
711 oxytocin receptor gene (OXTR) variation. *Horm. Behav.* **75**, 84–90 (2015).
- 712 36. Walum, H. *et al.* Genetic variation in the vasopressin receptor 1a gene (AVPR1A)  
713 associates with pair-bonding behavior in humans. *Proceedings of the National Academy of*  
714 *Sciences* **105**, 14153–14156 (2008).
- 715 37. Turner, L. M. *et al.* Monogamy evolves through multiple mechanisms: evidence from V1aR  
716 in deer mice. *Mol. Biol. Evol.* **27**, 1269–1278 (2010).
- 717 38. Trabzuni, D. *et al.* Widespread sex differences in gene expression and splicing in the adult  
718 human brain. *Nat. Commun.* **4**, 2771 (2013).
- 719 39. Nishida, Y., Yoshioka, M. & St-Amand, J. Sexually dimorphic gene expression in the  
720 hypothalamus, pituitary gland, and cortex. *Genomics* **85**, 679–687 (2005).

- 721 40. Shan, L. *et al.* Transcriptome Profiling Identifies Differentially Expressed Genes in Postnatal  
722 Developing Pituitary Gland of Miniature Pig. *DNA Res.* (2013). doi:10.1093/dnares/dst051
- 723 41. Lim, M. M. *et al.* Enhanced partner preference in a promiscuous species by manipulating  
724 the expression of a single gene. *Nature* **429**, 754–757 (2004).
- 725 42. Angelier, F. & Chastel, O. Stress, prolactin and parental investment in birds: a review. *Gen.*  
726 *Comp. Endocrinol.* **163**, 142–148 (2009).
- 727 43. Buntin, J. D., Hnasko, R. M. & Zuzick, P. H. Role of the ventromedial hypothalamus in  
728 prolactin-induced hyperphagia in ring doves. *Physiol. Behav.* **66**, 255–261 (1999).
- 729 44. McCarthy, M. M., Arnold, A. P., Ball, G. F., Blaustein, J. D. & De Vries, G. J. Sex  
730 differences in the brain: the not so inconvenient truth. *J. Neurosci.* **32**, 2241–2247 (2012).
- 731 45. Askew, J. A., Georgiou, G. C., Sharp, P. J. & Lea, R. W. Localization of progesterone  
732 receptor in brain and pituitary of the ring dove: influence of breeding cycle and estrogen.  
733 *Horm. Behav.* **32**, 105–113 (1997).
- 734 46. Walters, K. A. *et al.* Targeted loss of androgen receptor signaling in murine granulosa cells  
735 of preantral and antral follicles causes female subfertility. *Biol. Reprod.* **87**, 151 (2012).
- 736 47. Wacker, D. W., Wingfield, J. C., Davis, J. E. & Meddle, S. L. Seasonal changes in  
737 aromatase and androgen receptor, but not estrogen receptor mRNA expression in the brain  
738 of the free-living male song sparrow, *Melospiza melodia morphna*. *J. Comp. Neurol.* **518**,  
739 3819–3835 (2010).
- 740 48. Chang, C., Lee, S. O., Wang, R.-S., Yeh, S. & Chang, T.-M. Androgen receptor (AR)  
741 physiological roles in male and female reproductive systems: lessons learned from AR-  
742 knockout mice lacking AR in selective cells. *Biol. Reprod.* **89**, 21 (2013).
- 743 49. Hodes, G. E. *et al.* Sex Differences in Nucleus Accumbens Transcriptome Profiles  
744 Associated with Susceptibility versus Resilience to Subchronic Variable Stress. *J. Neurosci.*  
745 **35**, 16362–16376 (2015).
- 746 50. Balakrishnan, C. N., Lin, Y.-C., London, S. E. & Clayton, D. F. RNA-seq transcriptome

- 747 analysis of male and female zebra finch cell lines. *Genomics* **100**, 363–369 (2012).
- 748 51. Zhang, Z. *et al.* Transcriptome Analysis of Female and Male *Xiphophorus maculatus* Jp 163  
749 A. *PLoS One* **6**, e18379 (2011).
- 750 52. Sun, L., Wang, C., Huang, L., Wu, M. & Zuo, Z. Transcriptome analysis of male and female  
751 *Sebastiscus marmoratus*. *PLoS One* **7**, e50676 (2012).
- 752 53. Jansen, R. *et al.* Sex differences in the human peripheral blood transcriptome. *BMC*  
753 *Genomics* **15**, 33 (2014).
- 754 54. Weickert, C. S. *et al.* Transcriptome analysis of male–female differences in prefrontal  
755 cortical development. *Mol. Psychiatry* **14**, 558–561 (2009).
- 756 55. Lloyd, R. V. *et al.* Myosin XVA expression in the pituitary and in other neuroendocrine  
757 tissues and tumors. *Am. J. Pathol.* **159**, 1375–1382 (2001).
- 758 56. Rao, K. *et al.* Wortmannin-Sensitive and -Insensitive Steps in Calcium-Controlled  
759 Exocytosis in Pituitary Gonadotrophs: Evidence That Myosin Light Chain Kinase Mediates  
760 Calcium-Dependent and Wortmannin-Sensitive Gonadotropin Secretion. *Endocrinology*  
761 **138**, 1440–1449 (1997).
- 762 57. Ostlund, R. E., Jr, Leung, J. T. & Kipnis, D. M. Myosins of secretory tissues. *J. Cell Biol.* **77**,  
763 827–836 (1978).
- 764 58. Lovell-mansbridge, C. & Birkhead, T. R. Do female pigeons trade pair copulations for  
765 protection? *Anim. Behav.* **56**, 235–241 (1998).
- 766 59. Vézina, F., Salvante, K. G. & Williams, T. D. The metabolic cost of avian egg formation:  
767 possible impact of yolk precursor production? *J. Exp. Biol.* **206**, 4443–4451 (2003).
- 768 60. Murton, R. K. & Westwood, N. J. *Avian breeding cycles*. (Oxford University Press, USA,  
769 1977).
- 770 61. Gratao, A. A., Dahlhoff, M., Sinowatz, F., Wolf, E. & Schneider, M. R. Betacellulin  
771 overexpression in the mouse ovary leads to MAPK3/MAPK1 hyperactivation and reduces  
772 litter size by impairing fertilization. *Biol. Reprod.* **78**, 43–52 (2008).

- 773 62. Shimada, M., Hernandez-Gonzalez, I., Gonzalez-Robayna, I. & Richards, J. S. Paracrine  
774 and Autocrine Regulation of Epidermal Growth Factor-Like Factors in Cumulus Oocyte  
775 Complexes and Granulosa Cells: Key Roles for Prostaglandin Synthase 2 and  
776 Progesterone Receptor. *Mol. Endocrinol.* **20**, 1352–1365 (2006).
- 777 63. Dick, S. S., Ryuzoji, A., Morré, D. M. & Morré, D. J. Identification of the constitutive  
778 ultradian oscillator of the circadian clock (ENOX1) in *Saccharomyces cerevisiae*. (2013).
- 779 64. Serão, N. V. *et al.* Single nucleotide polymorphisms and haplotypes associated with feed  
780 efficiency in beef cattle. *BMC Genet.* **14**, 94 (2013).
- 781 65. Sell-Kubiak, E. *et al.* Genome-wide association study reveals novel loci for litter size and its  
782 variability in a Large White pig population. *BMC Genomics* **16**, 1049 (2015).
- 783 66. Liu, W. *et al.* A Genome-Wide SNP Scan Reveals Novel Loci for Egg Production and  
784 Quality Traits in White Leghorn and Brown-Egg Dwarf Layers. *PLoS One* **6**, e28600 (2011).
- 785 67. Karten, H. J. & Hodos, W. *A stereotaxic atlas of the brain of the pigeon: Columba livia.* **696**,  
786 (Johns Hopkins Press, 1967).
- 787 68. Andrews, S. R. *FastQC*. (2016).
- 788 69. MacManes, M. D. Establishing evidenced-based best practice for the de novo assembly  
789 and evaluation of transcriptomes from non-model organisms. *bioRxiv.org* 1–23 (2015).
- 790 70. Song, L. & Florea, L. Rcorrector: efficient and accurate error correction for Illumina RNA-  
791 seq reads. *Gigascience* **4**, 48 (2015).
- 792 71. Jiang, H., Lei, R., Ding, S.-W. & Zhu, S. Skewer: a fast and accurate adapter trimmer for  
793 next-generation sequencing paired-end reads. *BMC Bioinformatics* **15**, 182 (2014).
- 794 72. Haas, B. J. *et al.* De novo transcript sequence reconstruction from RNA-seq using the  
795 Trinity platform for reference generation and analysis. *Nat. Protoc.* **8**, 1494–1512 (2013).
- 796 73. Liu, J. *et al.* BinPacker: Packing-Based De Novo Transcriptome Assembly from RNA-seq  
797 Data. *PLoS Comput. Biol.* **12**, e1004772 (2016).
- 798 74. Kannan, S., Hui, J., Mazooji, K., Pachter, L. & Tse, D. *Shannon: An Information-Optimal de*

- 799 *Novo RNA-Seq Assembler*. (Cold Spring Harbor Labs Journals, 2016).
- 800 75. Simão, F. A., Waterhouse, R. M., Ioannidis, P., Kriventseva, E. V. & Zdobnov, E. M.  
801 BUSCO: assessing genome assembly and annotation completeness with single-copy  
802 orthologs. *Bioinformatics* **31**, 3210–3212 (2015).
- 803 76. Smith-Unna, R. D., Boursnell, C., Patro, R., Hibberd, J. M. & Kelly, S. TransRate: reference  
804 free quality assessment of de-novo transcriptome assemblies. *bioRxiv* 1–25 (2015).
- 805 77. Patro, R., Duggal, G. & Kingsford, C. Accurate, fast, and model-aware transcript expression  
806 quantification with Salmon. *bioRxiv.org* 1–35 (2015).
- 807 78. Camacho, C. *et al.* BLAST+: architecture and applications. *BMC Bioinformatics* **10**, 421  
808 (2009).
- 809 79. RStudio Team. RStudio: Integrated Development for R. (2015). Available at:  
810 <http://www.rstudio.com/>. (Accessed: 1st September 2016)
- 811 80. Sonesson, C., Love, M. I. & Robinson, M. D. Differential analyses for RNA-seq: transcript-  
812 level estimates improve gene-level inferences. *F1000Res.* **4**, 1521–1519 (2015).
- 813 81. Robinson, M. D., McCarthy, D. J. & Smyth, G. K. edgeR: a Bioconductor package for  
814 differential expression analysis of digital gene expression data. *Bioinformatics* **26**, 139–140  
815 (2010).
- 816 82. Lex, A., Gehlenborg, N., Strobel, H., Vuilleumot, R. & Pfister, H. UpSet: Visualization of  
817 Intersecting Sets. *IEEE Trans. Vis. Comput. Graph.* **20**, 1983–1992 (2014).
- 818 83. Young, I. T. Proof without prejudice: use of the Kolmogorov-Smirnov test for the analysis of  
819 histograms from flow systems and other sources. *J. Histochem. Cytochem.* **25**, 935–941  
820 (1977).
- 821 84. Alexa, A. & Rahnenfuhrer, J. topGO: enrichment analysis for gene ontology. *R package*  
822 *version 2*, (2010).
- 823 81. Zhang Z, Wang Y, Wang S, Liu J, Warren W, Mitreva M, Walter RB (2011) Transcriptome

824 Analysis of Female and Male *Xiphophorus maculatus* Jp 163 A. PLoS One 6:e18379

825 Available at:

826 <http://journals.plos.org/plosone/article/asset?id=10.1371/journal.pone.0018379.PDF>.
